# Supplementary material for: NiCo2O4 thin film prepared by electrochemical deposition as a hole-transport layer for efficient inverted perovskite solar cells
Source: Royal Society of Chemistry journal article supplement (doi:10.1039/d2ra01816k), 2022-01-01
Supplement: d2ra01816k1.pdf [file d2ra01816k1.pdf]

# NiCo<sub>2</sub>O<sub>4</sub> Thin Film Prepared by Electrochemically Deposition as Hole-Transport Layer for Efficient Inverted Perovskite Solar Cells

*Sen Wang,<sup>a</sup> Linqin Wang,<sup>b</sup> Chang Liu,<sup>a</sup> Yu Shan,<sup>a</sup> Fusheng Li,<sup>\*a</sup> and Licheng Sun<sup>ab</sup>*

<sup>a</sup>State Key Laboratory of Fine Chemicals, Institute of Artificial Photosynthesis, DUT-KTH Joint Education and Research Centre on Molecular Devices, Dalian University of Technology, Dalian 116024, P. R. China.

<sup>b</sup>Center of Artificial Photosynthesis for Solar Fuels, School of Science, Westlake University, 310024 Hangzhou, China.

\*Corresponding author: [fusheng@dlut.edu.cn](mailto:fusheng@dlut.edu.cn)

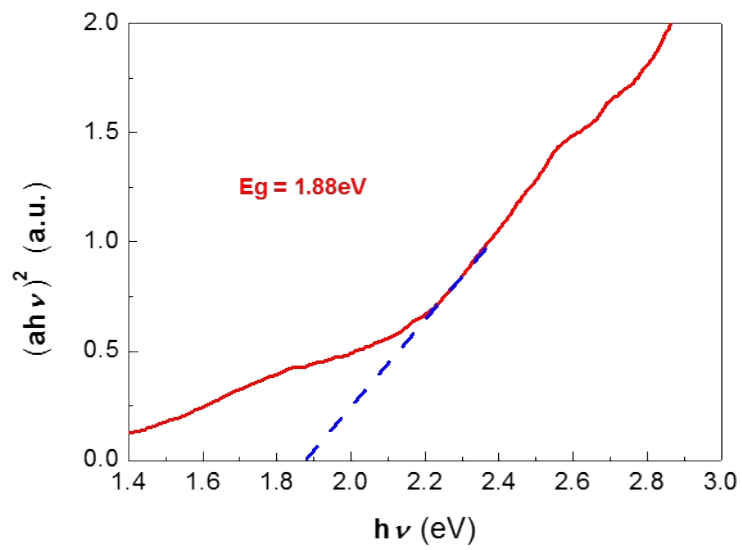

**Figure S1.** Tauc plot of NiCo<sub>2</sub>O<sub>4</sub> film.

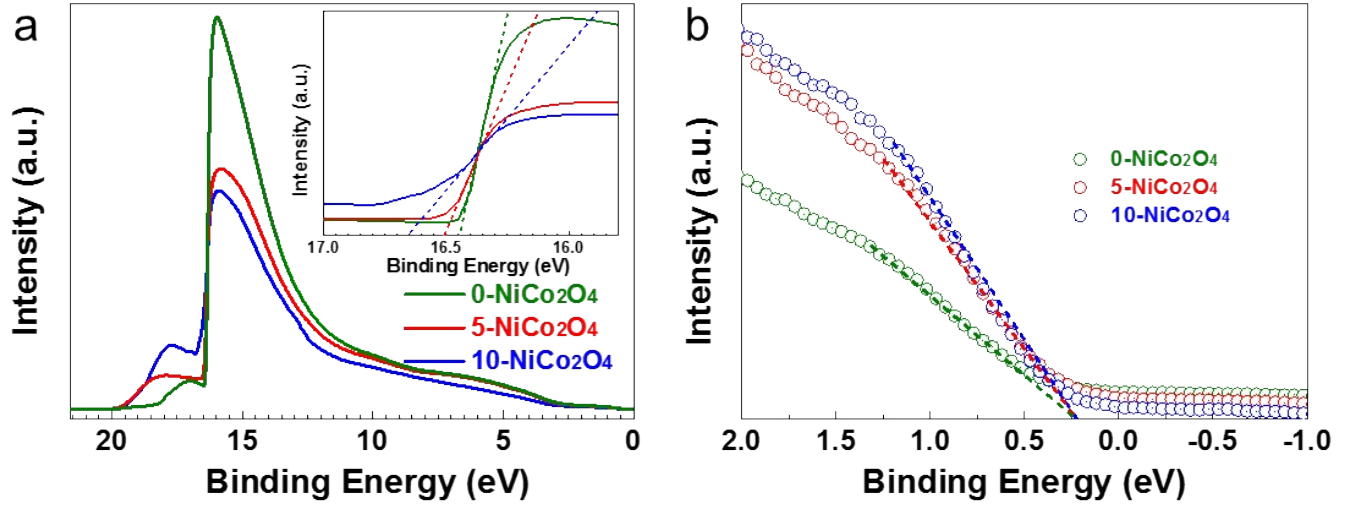

**Figure S2.** (a) UPS spectra of different  $\text{NiCo}_2\text{O}_4$  films for work function and VB determination. The inset show the enlarged UPS spectra at the binding energy range of 15.5~17.0, respectively. (b) The enlarged valence band position of different  $\text{NiCo}_2\text{O}_4$  films.

The work function ( $E_{\text{work}}$  corresponding to the Fermi level), valence band (VB), and conduction band (CB) of  $\text{NiCo}_2\text{O}_4$ .

$$E_{\text{work}} = h\nu - (E_{\text{cutoff}} - E_F) \quad \text{equation S1}$$

$$E_{\text{VB}} = E_{\text{work}} + E_{\text{VBM}} \quad \text{equation S2}$$

$$E_{\text{CB}} = E_{\text{VB}} - E_g \quad \text{equation S3}$$

Where, the  $E_{\text{cutoff}}$  is cut-off energy edge, the  $E_F$  is initial edge energy, the  $E_{\text{VBM}}$  is the energy from valence band maximum to Fermi level, the  $E_g$  is band gap energy (obtained by UV-vis spectra), the  $E_{\text{VB}}$  is valence band energy and the  $E_{\text{CB}}$  is conduction band energy.

**For 0-NiCo<sub>2</sub>O<sub>4</sub> film,**

$$E_{\text{work}} = 21.22 - (16.45 - 0) = 4.77 \text{ eV}; E_{VB} = 4.77 + 0.22 = 4.99 \text{ eV}; \text{ and } E_{CB} = 4.99 - 1.88 = 3.11 \text{ eV}.$$

**For 5-NiCo<sub>2</sub>O<sub>4</sub> film,**

$$E_{\text{work}} = 21.22 - (16.50 - 0) = 4.72 \text{ eV}; E_{VB} = 4.72 + 0.22 = 4.94 \text{ eV}; \text{ and } E_{CB} = 4.94 - 1.88 = 3.06 \text{ eV}.$$

**For 10-NiCo<sub>2</sub>O<sub>4</sub> film,**

$$E_{\text{work}} = 21.22 - (16.65 - 0) = 4.57 \text{ eV}; E_{VB} = 4.57 + 0.22 = 4.79 \text{ eV}; \text{ and } E_{CB} = 4.79 - 1.88 = 2.91 \text{ eV}.$$

$$E_{\text{work}} = 21.2 - (17.15 - 0) = 4.05 \text{ eV}; E_{VB} = 4.05 + 1.76 = 5.81 \text{ eV}; \text{ and } E_{CB} = 5.81 - 2.09 = 3.72 \text{ eV}.$$

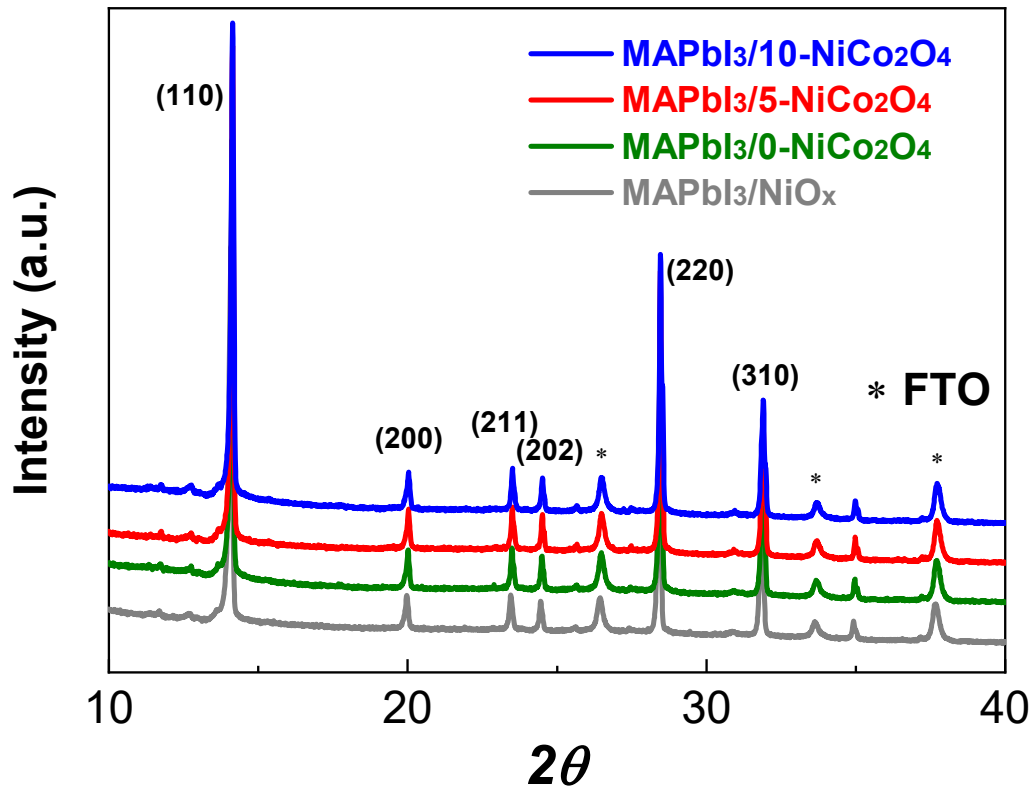

**Figure S3.** XRD patterns of MAPbI<sub>3</sub> films deposited on NiO<sub>x</sub> and NiCo<sub>2</sub>O<sub>4</sub> HTLs.

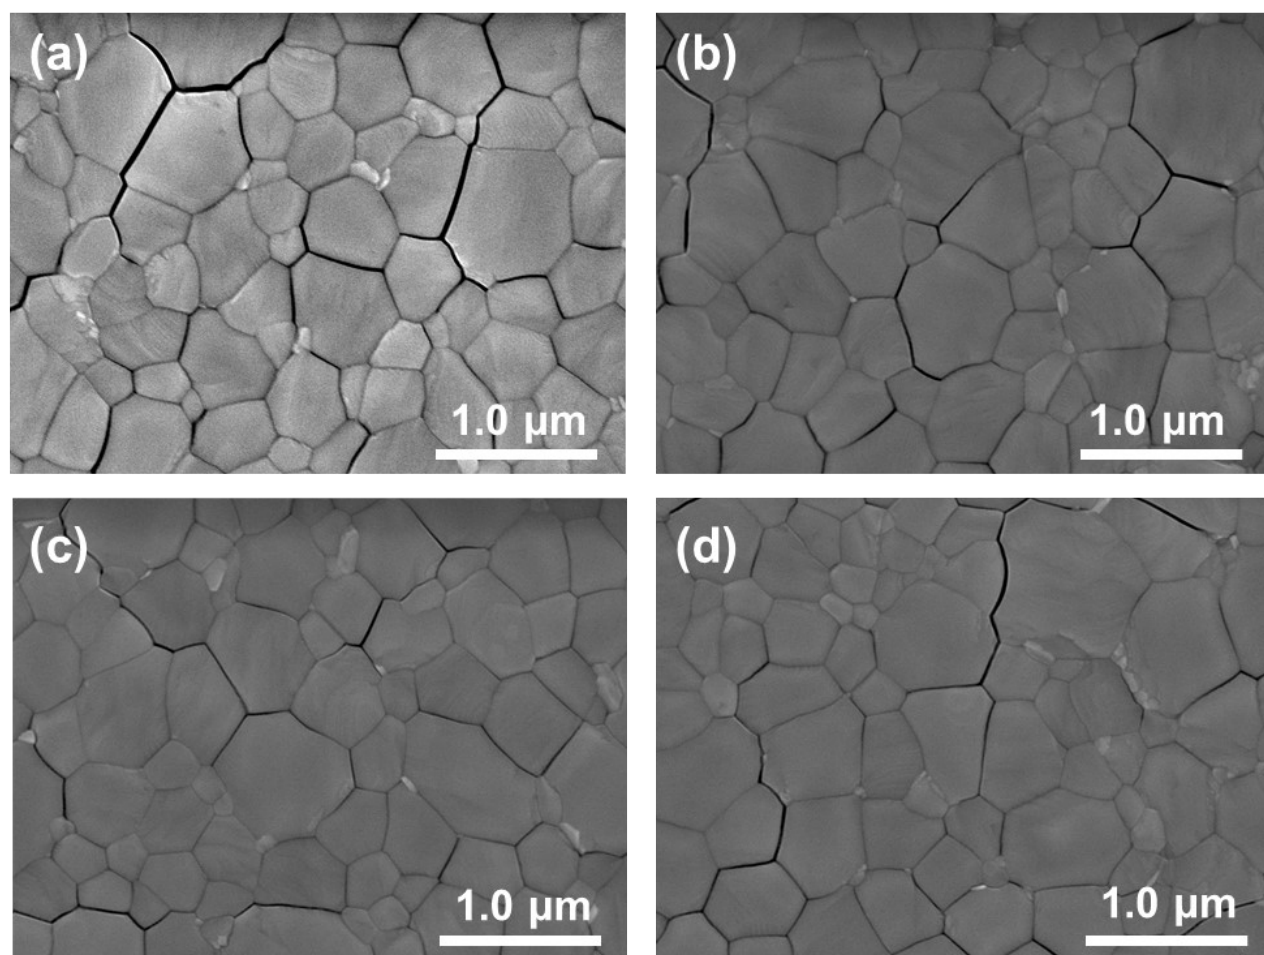

**Figure S4.** Top-view SEM images of the perovskite film deposited on a) NiO<sub>x</sub>, b) 0-NiCo<sub>2</sub>O<sub>4</sub>, c) 5-NiCo<sub>2</sub>O<sub>4</sub>, and d) 10-NiCo<sub>2</sub>O<sub>4</sub> HTL films prepared by the charge density of 10 mC·cm<sup>-2</sup>.

**Table S1** Parameters of the TRPL spectroscopy based on different samples.

| Samples                                  | $\tau_{ave}$ (ns) | $\tau_1$ (ns) | A1    | $\tau_2$ (ns) | A2    |
|------------------------------------------|-------------------|---------------|-------|---------------|-------|
| NiO <sub>x</sub> /PSK                    | 42.63             | 32.72         | 0.953 | 105.51        | 0.047 |
| 0-NiCo <sub>2</sub> O <sub>4</sub> /PSK  | 34.34             | 22.25         | 0.943 | 86.25         | 0.057 |
| 5-NiCo <sub>2</sub> O <sub>4</sub> /PSK  | 31.74             | 15.41         | 0.944 | 82.98         | 0.056 |
| 10-NiCo <sub>2</sub> O <sub>4</sub> /PSK | 64.68             | 45.55         | 0.699 | 87.74         | 0.301 |

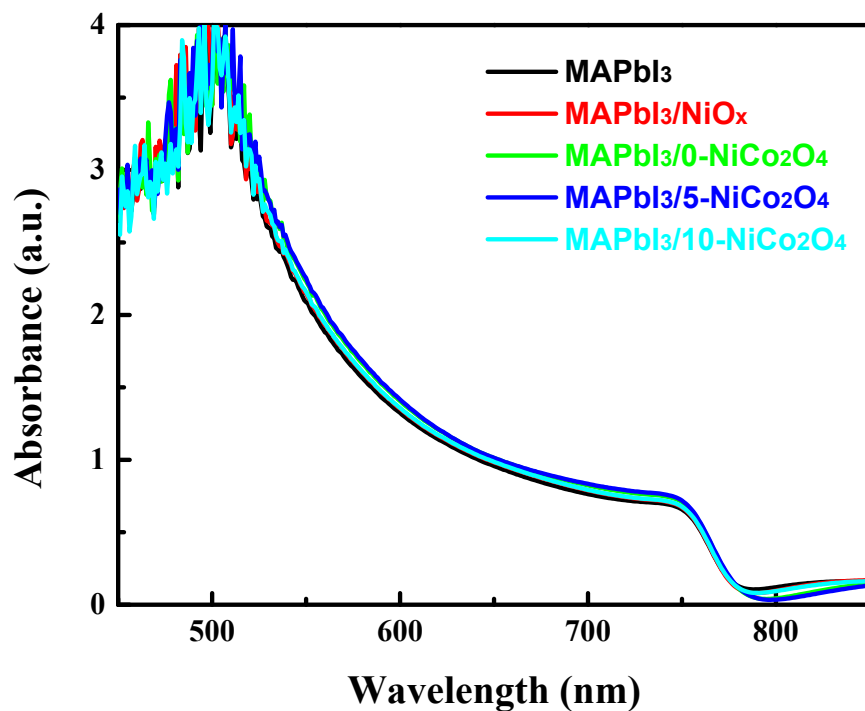

**Figure S5.** UV-vis absorption spectra of perovskite films on  $\text{NiO}_x$  and different  $\text{NiCo}_2\text{O}_4$  films.

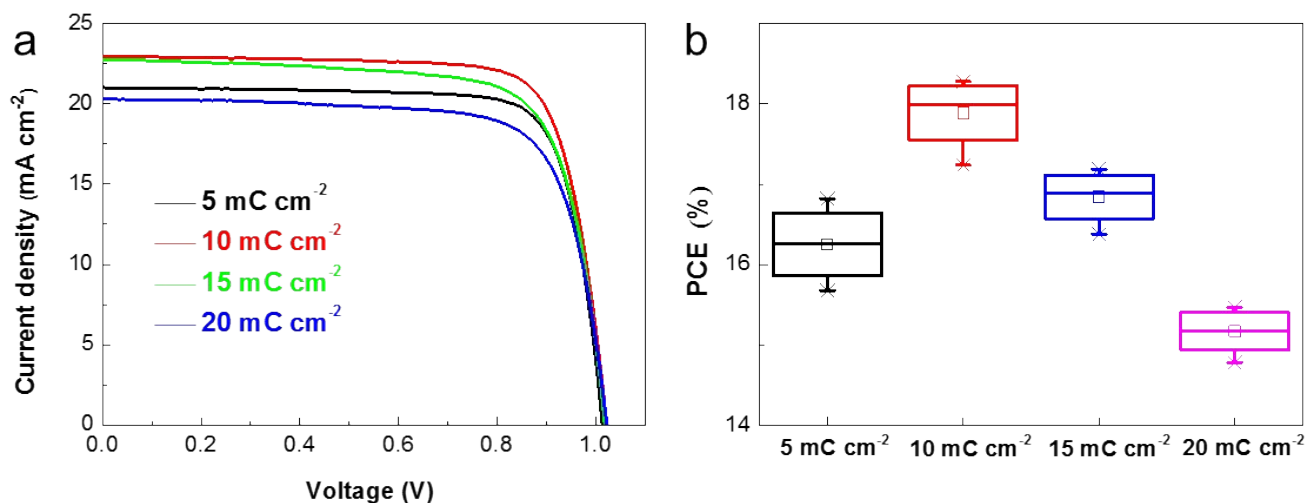

**Figure S6.** a).  $J-V$  characteristics of the best PSCs based on 0- $\text{NiCo}_2\text{O}_4$  HTLs prepared by different charge densities. b). The statistics of 10 pieces of PSCs based on 0- $\text{NiCo}_2\text{O}_4$  HTLs prepared by different charge densities.



**Table S2.** Device parameters of the PSCs based on 0-NiCo<sub>2</sub>O<sub>4</sub> HTLs prepared by different charge densities.

| Depositon<br>charge density<br>(mC·cm <sup>-2</sup> ) | <i>V<sub>oc</sub></i><br>(mV) | <i>J<sub>sc</sub></i><br>(mA·cm <sup>-2</sup> ) | <i>FF</i><br>(%)        | PCE<br>(%)              |
|-------------------------------------------------------|-------------------------------|-------------------------------------------------|-------------------------|-------------------------|
| 5                                                     | 1.01 ± 0.01 (1.01)            | 20.84 ± 0.37<br>(21.00)                         | 77.69 ± 1.42<br>(79.07) | 16.35 ± 0.51<br>(16.82) |
| 10                                                    | 1.02 ± 0.01 (1.02)            | 22.67 ± 0.25 (22.93)                            | 77.85 ± 1.24<br>(78.05) | 17.93 ± 0.29 (18.28)    |
| 15                                                    | 1.02 ± 0.01<br>(1.02)         | 22.59 ± 0.30 (22.71)                            | 72.62 ± 2.00<br>(74.37) | 16.68 ± 0.37<br>(17.19) |
| 20                                                    | 1.02 ± 0.01<br>(1.03)         | 20.28 ± 0.36 (20.36)                            | 73.78 ± 1.49<br>(73.80) | 15.24 ± 0.16 (15.47)    |

**Table S3.** Photovoltaic parameters of PSCs based on NiO<sub>x</sub> and NiCo<sub>2</sub>O<sub>4</sub> HTLs under the illumination.

| HTL                                 | $V_{oc}$<br>(V) | $J_{sc}$<br>(mA·cm <sup>-2</sup> ) | $FF$<br>(%)  | PCE<br>(%)   |
|-------------------------------------|-----------------|------------------------------------|--------------|--------------|
| NiO <sub>x</sub>                    | 1.02 ± 0.01     | 20.63 ± 0.28                       | 78.34 ± 1.38 | 18.17 ± 0.32 |
| 0-NiCo <sub>2</sub> O <sub>4</sub>  | 1.03 ± 0.01     | 22.73 ± 0.36                       | 77.29 ± 1.55 | 18.26 ± 0.37 |
| 5-NiCo <sub>2</sub> O <sub>4</sub>  | 1.02 ± 0.01     | 23.88 ± 0.37                       | 77.99 ± 1.17 | 18.94 ± 0.29 |
| 10-NiCo <sub>2</sub> O <sub>4</sub> | 1.01 ± 0.01     | 22.90 ± 0.44                       | 72.66 ± 1.33 | 16.76 ± 0.23 |

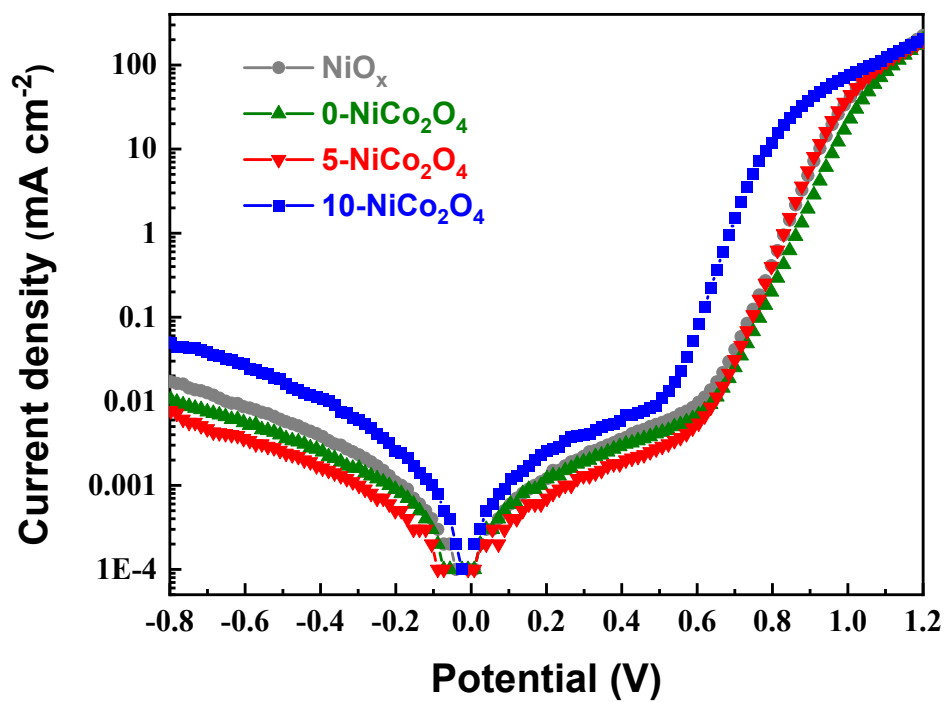

**Figure S7.** Dark  $J$ - $V$  characteristics of the devices based on NiO<sub>x</sub> and NiCo<sub>2</sub>O<sub>4</sub> HTLs.

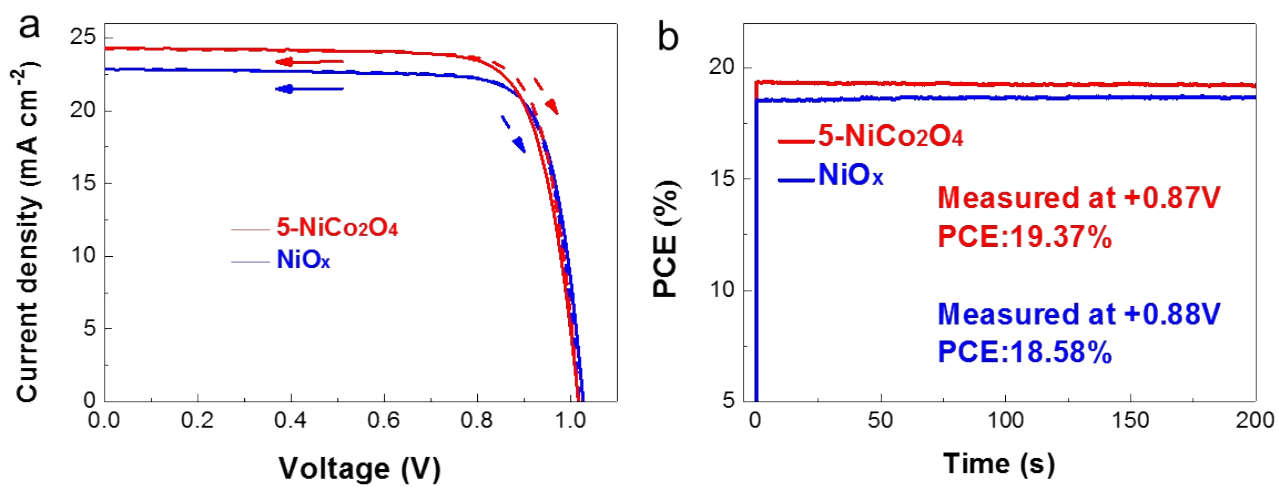

**Figure S8.** a) Current–voltage curves with reverse scan mode for the best-performing devices based on 5-NiCo<sub>2</sub>O<sub>4</sub> and NiO<sub>x</sub> HTLs. b) The steady-state power output at the maximum power point for the optimized devices.

**Table S4.** Device parameters of the PSCs based on 5-NiCo<sub>2</sub>O<sub>4</sub> and NiO<sub>x</sub> HTLs with reverse scan mode.

| HTLs                               | Scan direction | $V_{oc}$ (V) | $J_{sc}$ (mA·cm <sup>-2</sup> ) | $FF$ | PCE (%) |
|------------------------------------|----------------|--------------|---------------------------------|------|---------|
| NiO <sub>x</sub>                   | Re             | 1.03         | 22.86                           | 0.79 | 18.68   |
|                                    | Fw             | 1.02         | 22.89                           | 0.80 | 18.75   |
| 5-NiCo <sub>2</sub> O <sub>4</sub> | Re             | 1.02         | 24.31                           | 0.78 | 19.24   |
|                                    | Fw             | 1.02         | 24.25                           | 0.80 | 19.73   |
